# Supplementary material
Source: Springer Nature journal article supplement (https://www.springermedizin.de/resource/supplementary/12936_2013_2839_MOESM2_ESM.pdf/9544314)

**A**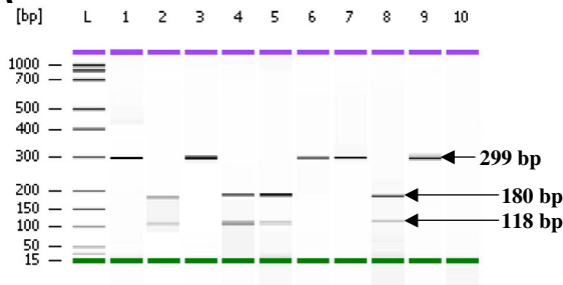**B**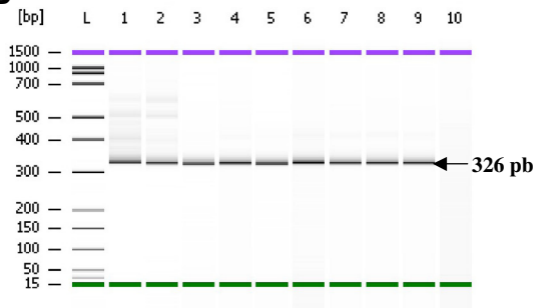**C**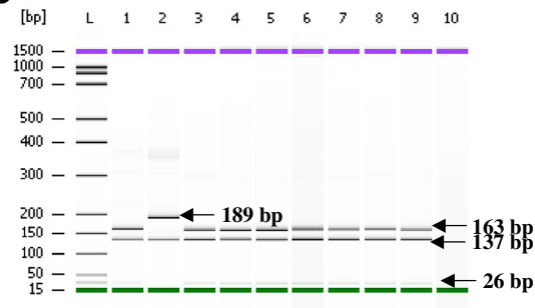

Supplement: MOESM2 [file 9544314]
